# Supplementary material for: Functional annotation of rare structural variation in the human brain
Source: PubMed Central journal article supplement (PMC7293301; doi:10.1038/s41467-020-16736-1), 2020-06-12
Supplement: 41467_2020_16736_MOESM1_ESM.pdf [file 41467_2020_16736_MOESM1_ESM.pdf]

Supplementary Information

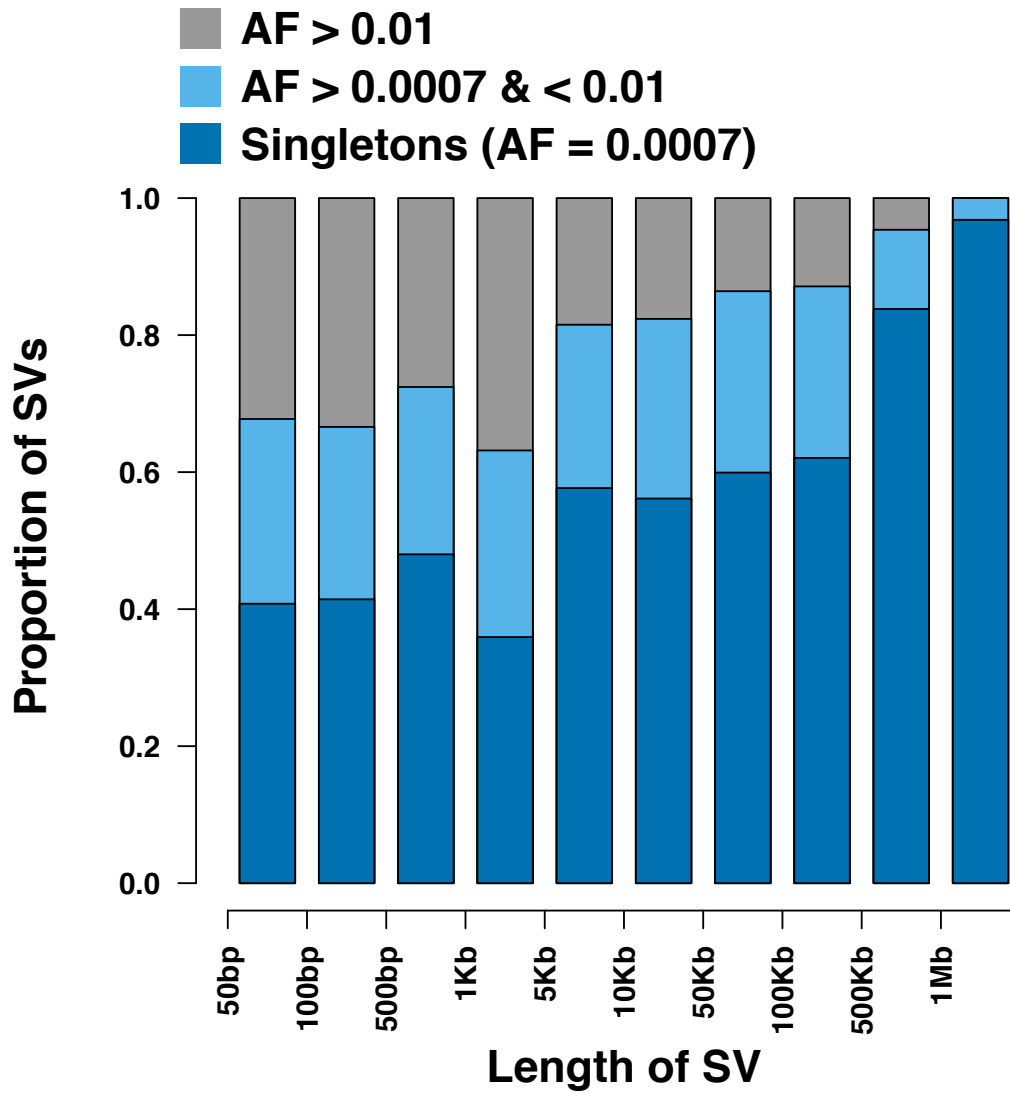

Supplementary Figure 1. Relationship between allele frequency stratified by SV length.

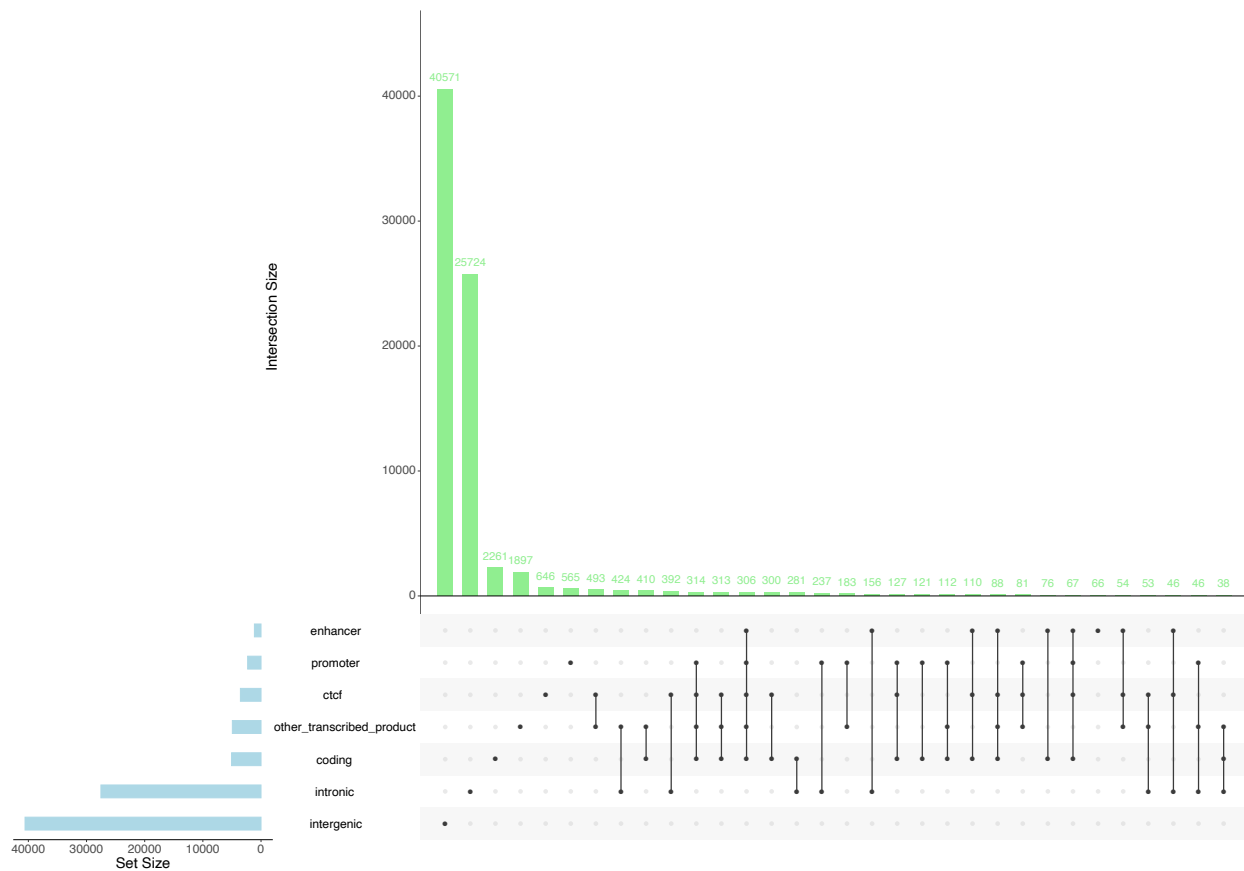

**Supplementary Figure 2.** Counts of SVs by combination of annotations (green) and full set of any annotation (blue)

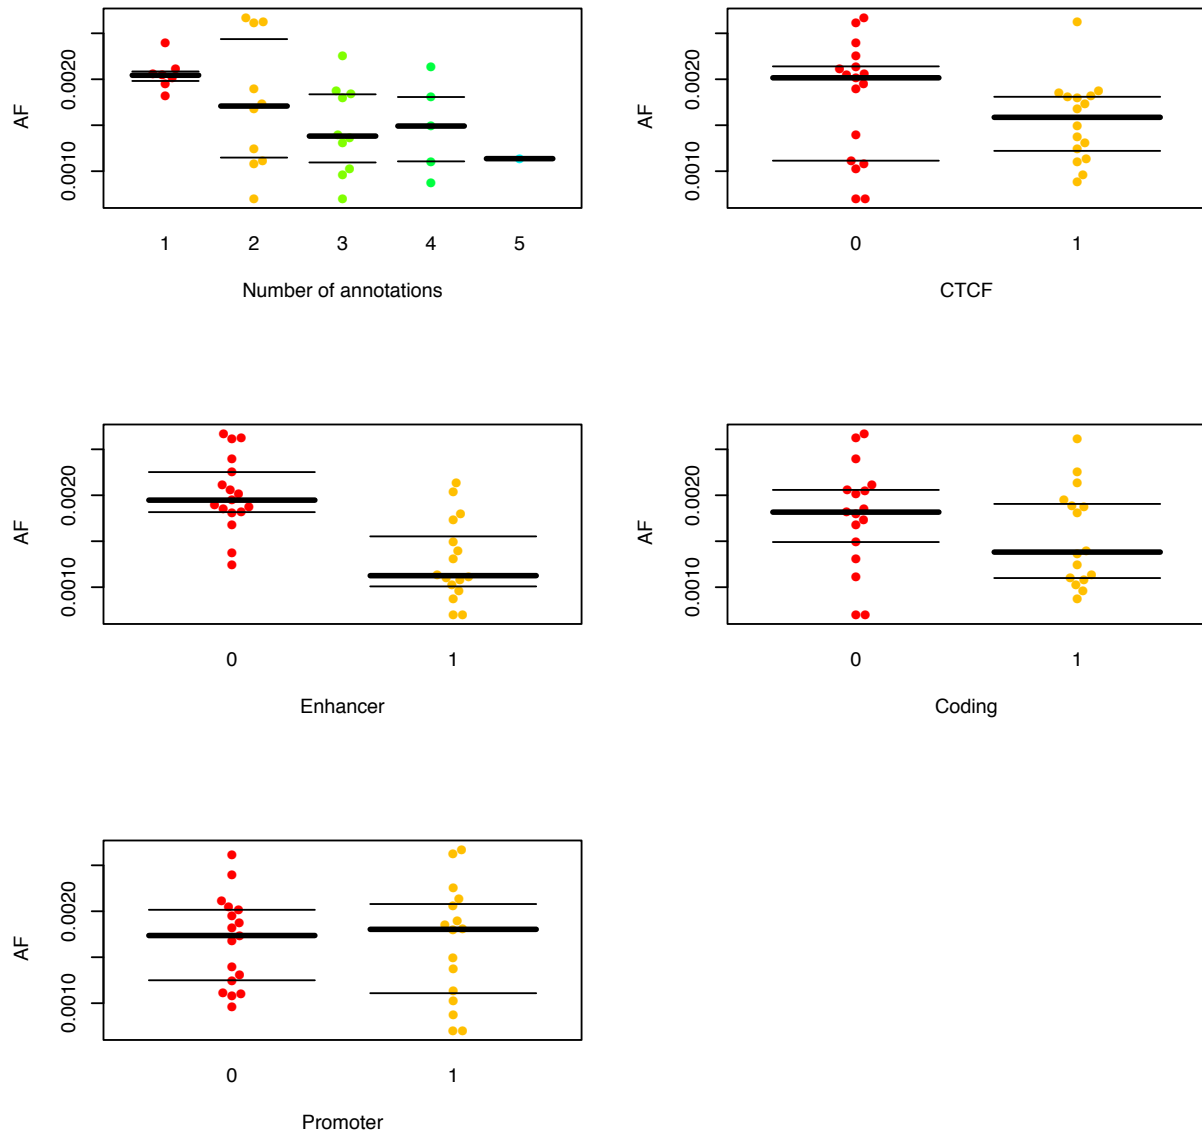

**Supplementary Figure 3.** Mean allele frequency for each of 33 combinations of annotations split by the number of unique annotations and then by SVs that affect all combinations that include CTCF sites, enhancers, coding genes and promoters. Each point represents an annotation combination (or unique annotation). The thick bar is the median and the thin bars are 95% confidence interval akin to standard boxplot.

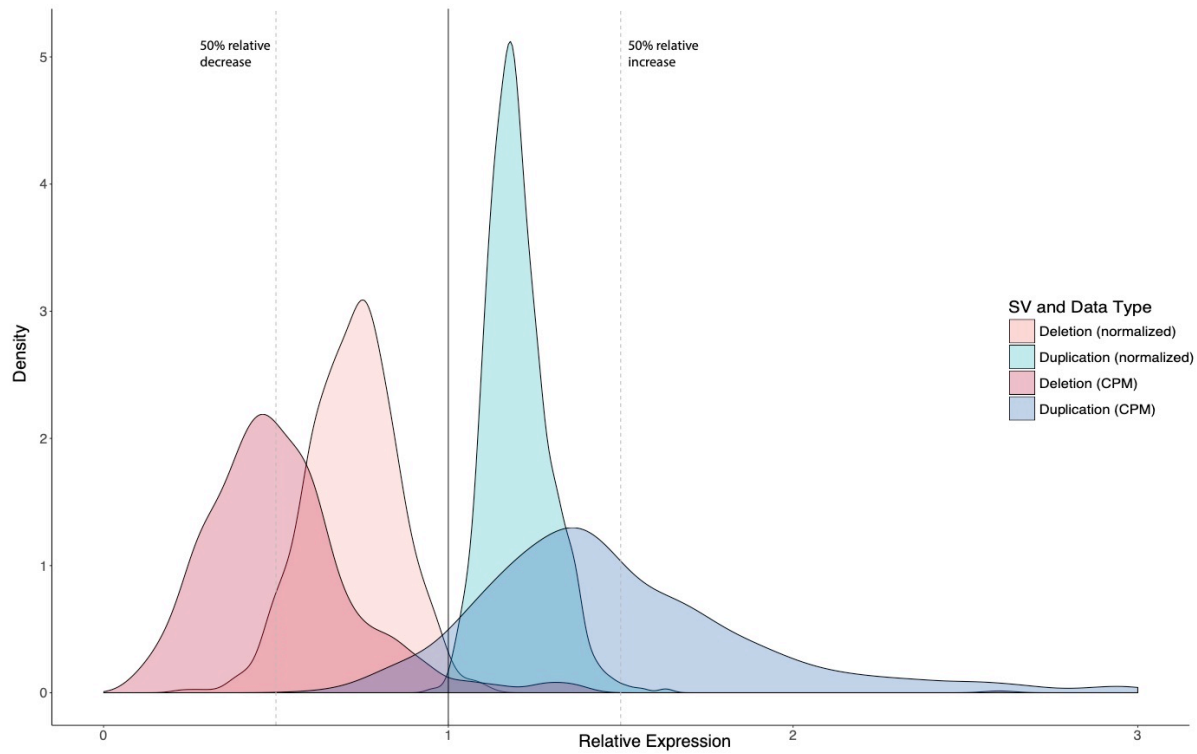

**Supplementary Figure 4.** Distribution plots of the relative expression of full gene deletions or duplications compared to the rest of the CNV in the normalized and covariate adjusted data (normalized) and in the raw counts per million (CPM). Dashed lines represent expected 50% decrease and 50% increase for full gene deletions and duplications respectively.

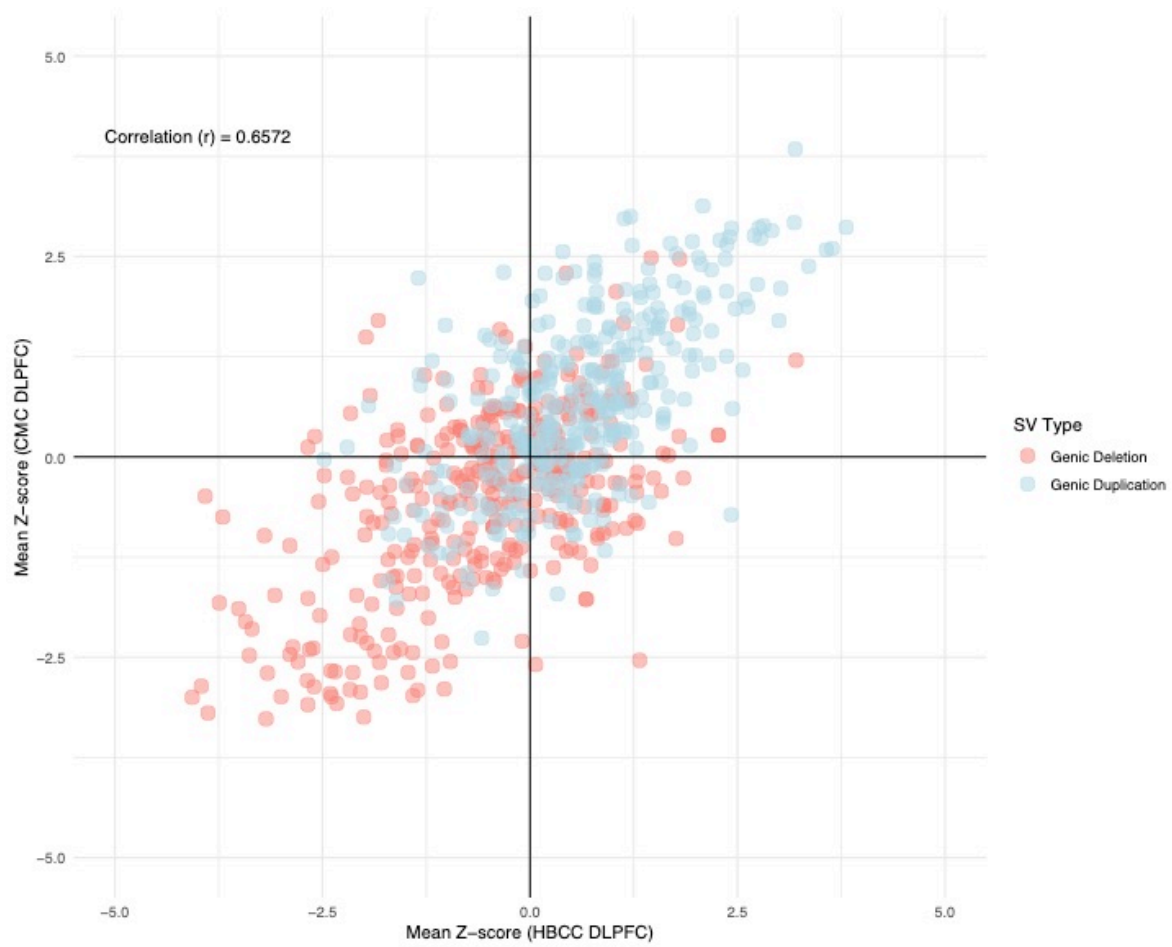

**Supplementary Figure 5.** Correlation of mean expression values per gene/CNV pair of all CNVs affecting genes between the two independent cohorts (CMC and CMC\_HBCC).

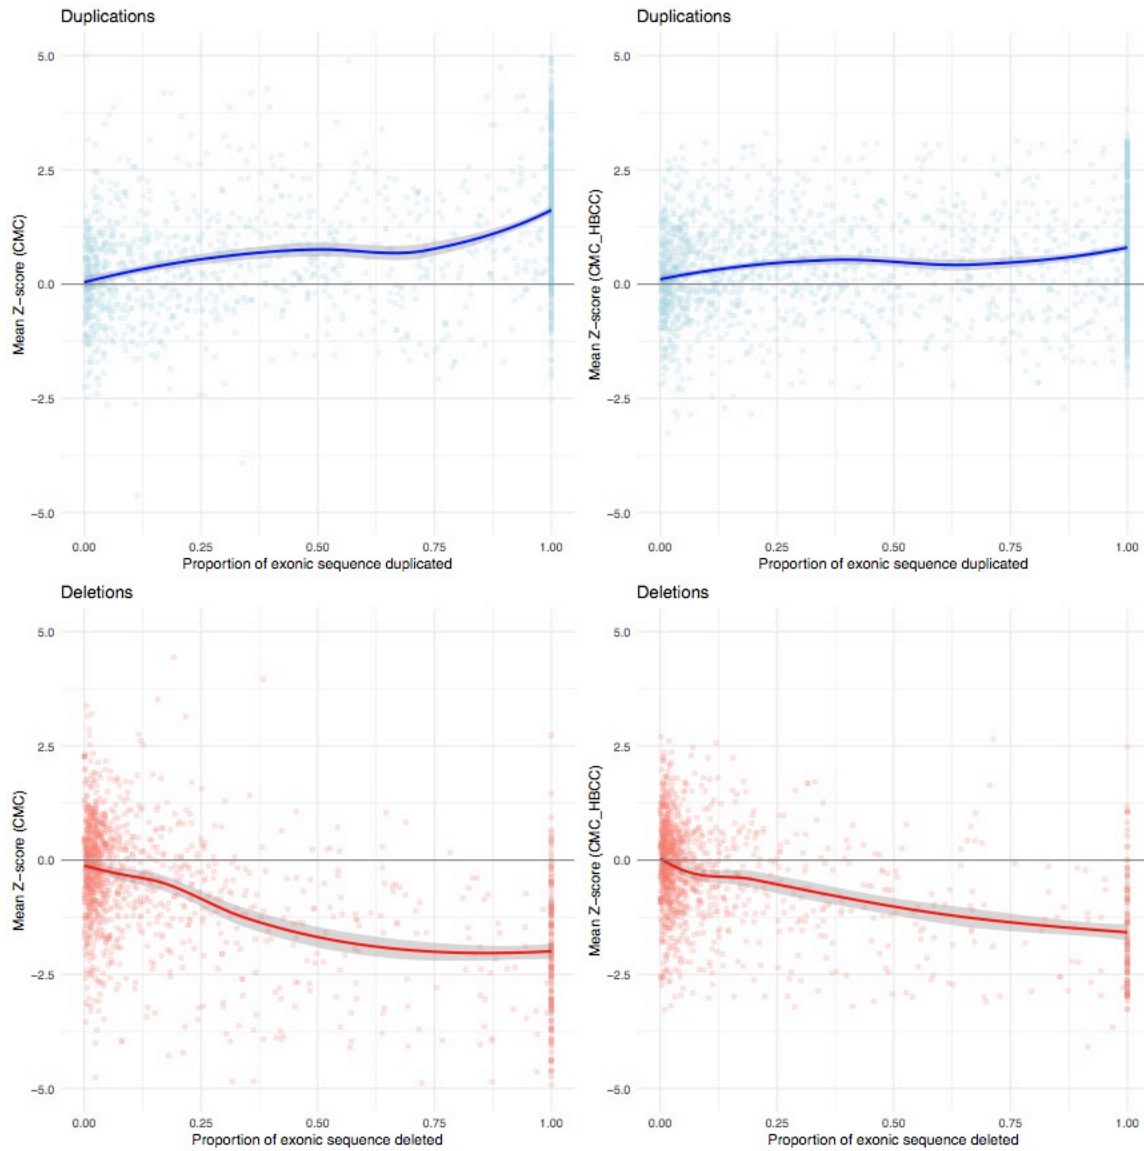

**Supplementary Figure 6.** Distribution of relative expression (Z-score) as a product of the proportion of exonic sequence of a gene that is deleted (red) or duplication (blue) stratified by cohort. Lines are loess fits and grey area represents the 95% confidence interval of the line.

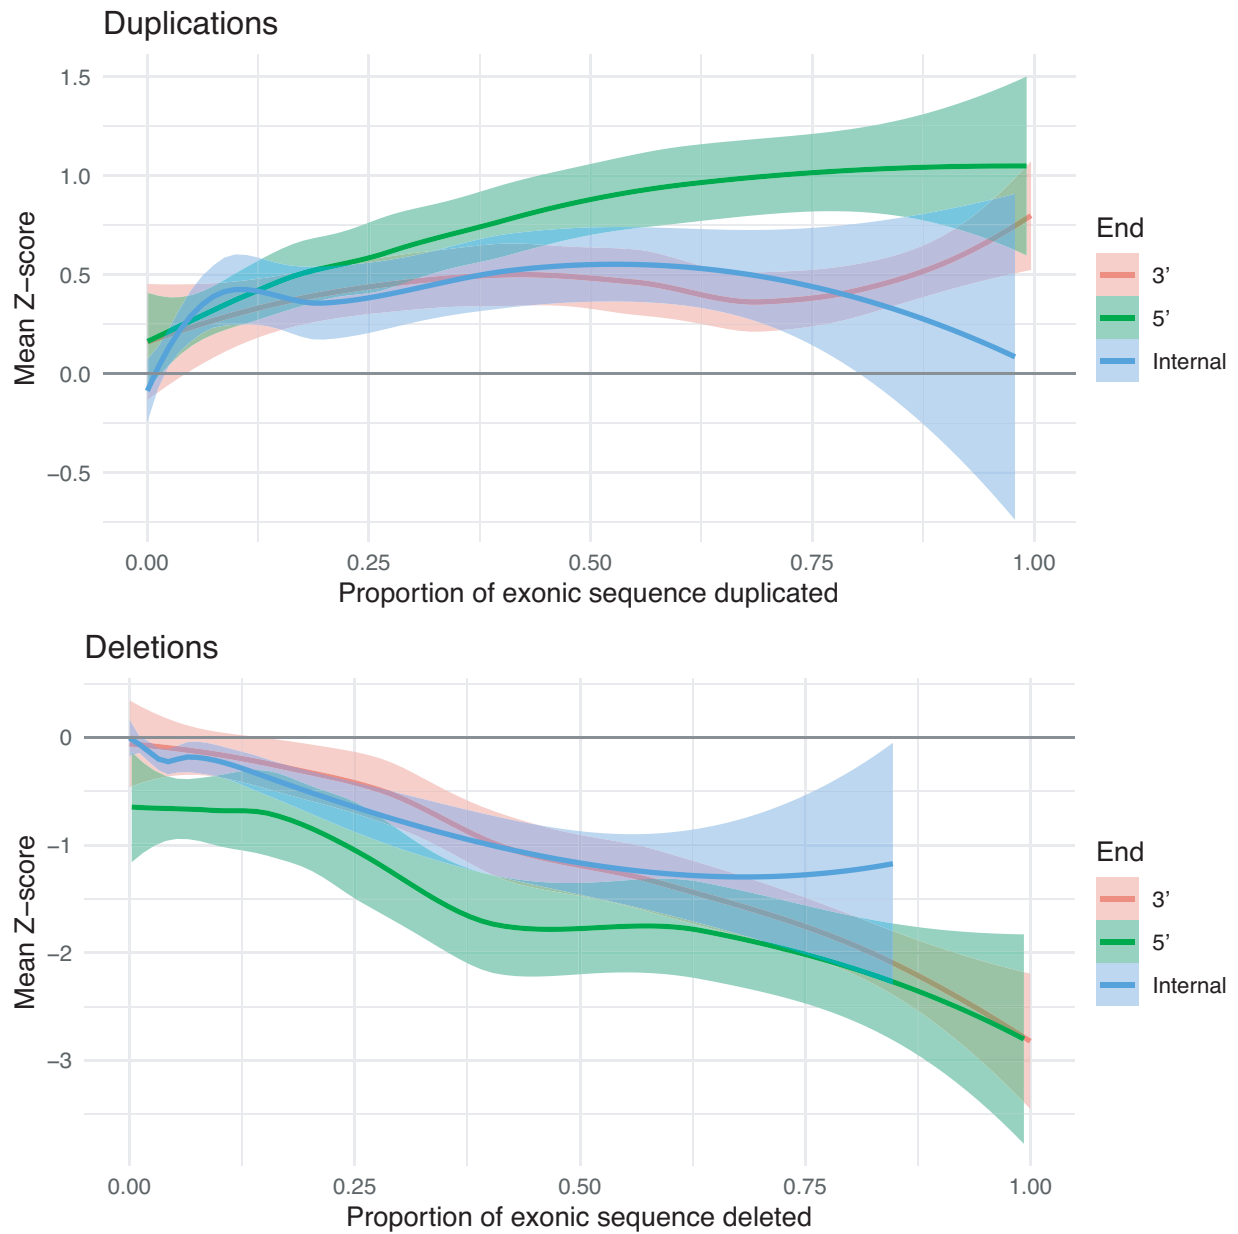

**Supplementary Figure 7.** Distribution of relative expression (Z-score) as a product of the proportion of exonic sequence of a gene that is deleted or duplication stratified by whether the CNV affected the transcription start (5'), transcription end (3') or was internal to the exonic sequence. Lines are loess fits and grey area represents the 95% confidence interval of the line.

*Matched to intergenic SV by length*

| SV Type      | Annot      | N     | Length   | AF      | Singleton Proportion | N     | Length  | Length (intergenic) | p-value (length) | AF      | AF (intergenic) | p-value  |
|--------------|------------|-------|----------|---------|----------------------|-------|---------|---------------------|------------------|---------|-----------------|----------|
| All          | coding     | 5061  | 83742.3  | 0.00182 | 0.582                | 4618  | 8884.4  | 8867.2              | 0.851            | 0.00168 | 0.00193         | 7.42E-15 |
|              | enhancer   | 1137  | 267102.2 | 0.00134 | 0.706                | 1055  | 16584.2 | 16566.9             | 0.976            | 0.00123 | 0.00196         | 6.42E-30 |
|              | promoter   | 2297  | 155880.2 | 0.00186 | 0.559                | 1711  | 12066.7 | 12059.4             | 0.995            | 0.00193 | 0.00191         | 7.00E-01 |
|              | ctcf       | 3544  | 135901.9 | 0.00160 | 0.645                | 3763  | 11251.6 | 11216.5             | 0.809            | 0.00161 | 0.00191         | 1.00E-16 |
|              | intronic   | 27525 | 1485.9   | 0.00201 | 0.518                | 29070 | 1357.5  | 1363.8              | 0.086            | 0.00188 | 0.00193         | 4.19E-04 |
|              | intergenic | 40571 | 1405.6   | 0.00211 | 0.497                |       |         |                     |                  |         |                 |          |
| Deletions    | coding     | 2173  | 37341.5  | 0.00187 | 0.586                | 2296  | 6498.9  | 6453.3              | 0.655            | 0.00171 | 0.00184         | 1.34E-04 |
|              | enhancer   | 421   | 118339.7 | 0.00170 | 0.639                | 507   | 10277.2 | 10236.5             | 0.819            | 0.00146 | 0.00197         | 6.83E-09 |
|              | promoter   | 873   | 64859.2  | 0.00204 | 0.541                | 759   | 6162.4  | 6164.0              | 0.998            | 0.00202 | 0.00200         | 6.70E-01 |
|              | ctcf       | 1588  | 70095.3  | 0.00178 | 0.613                | 2143  | 8619.5  | 8555.7              | 0.710            | 0.00172 | 0.00187         | 1.62E-04 |
|              | intronic   | 19528 | 1382.6   | 0.00198 | 0.530                | 20489 | 1298.4  | 1303.0              | 0.198            | 0.00185 | 0.00189         | 7.52E-03 |
|              | intergenic | 17938 | 1555.3   | 0.00201 | 0.517                |       |         |                     |                  |         |                 |          |
| Duplications | coding     | 2439  | 66000.2  | 0.00177 | 0.581                | 1903  | 13491.1 | 13498.2             | 0.894            | 0.00163 | 0.00202         | 2.46E-12 |
|              | enhancer   | 656   | 117462.2 | 0.00110 | 0.755                | 529   | 23180.3 | 23198.7             | 0.865            | 0.00101 | 0.00199         | 6.62E-25 |
|              | promoter   | 1145  | 106414.4 | 0.00167 | 0.583                | 720   | 21588.8 | 21589.8             | 0.991            | 0.00176 | 0.00204         | 8.96E-02 |
|              | ctcf       | 1826  | 100582.9 | 0.00144 | 0.677                | 1336  | 17453.0 | 17425.1             | 0.936            | 0.00142 | 0.00195         | 3.16E-16 |
|              | intronic   | 5816  | 1860.1   | 0.00207 | 0.498                | 6198  | 1882.7  | 1891.1              | 0.209            | 0.00192 | 0.00197         | 2.19E-02 |
|              | intergenic | 5719  | 3244.4   | 0.00214 | 0.476                |       |         |                     |                  |         |                 |          |

**Supplementary Table 1.** Frequency measures (allele frequency [AF] and singleton proportion within annotation class) of all SVs overlapping a particular annotation, only deletions or only duplications. All are then matched 1 to 1 to intergenic SVs based on length and tested for frequency differences using Wilcoxon Rank Sum test.



| Annot      | N     | Length  | AF      | Singleton Proportion | N     | Length | Length (inte | p-value (length) | AF      | AF (intergenic) | p-value  |
|------------|-------|---------|---------|----------------------|-------|--------|--------------|------------------|---------|-----------------|----------|
| coding     | 2542  | 4342.8  | 0.00195 | 0.552                | 2874  | 4673.2 | 4676.5       | 0.815            | 0.00179 | 0.00197         | 1.48E-05 |
| enhancer   | 222   | 6491.2  | 0.00204 | 0.523                | 260   | 6109.6 | 6087.5       | 0.961            | 0.00177 | 0.00192         | 1.66E-01 |
| promoter   | 802   | 675.9   | 0.00206 | 0.510                | 749   | 704.1  | 708.0        | 0.962            | 0.00207 | 0.00196         | 1.29E-01 |
| ctcf       | 1038  | 21980.2 | 0.00182 | 0.585                | 2106  | 8578.1 | 8562.2       | 0.914            | 0.00175 | 0.00194         | 1.48E-04 |
| intronic   | 25724 | 961.7   | 0.00202 | 0.517                | 27573 | 923.9  | 932.0        | 0.090            | 0.00189 | 0.00192         | 4.34E-03 |
| intergenic | 40571 | 1405.6  | 0.00211 | 0.497                |       |        |              |                  |         |                 |          |

**Supplementary Table 2.** Frequency measures (allele frequency [AF] and singleton proportion within annotation class) of all SVs overlapping only a single annotation class. Both are then matched 1 to 1 to intergenic SVs based on length and tested for frequency differences using Wilcoxon Rank Sum test.

| CNV Type     | Variable            | Est.      | SE       | T      | P        |
|--------------|---------------------|-----------|----------|--------|----------|
| Deletions    | Enhancer sum        | -1.41E-02 | 8.82E-03 | -1.597 | 0.110305 |
|              | Promoter proportion | 1.98E-01  | 1.35E-01 | 1.461  | 0.143879 |
|              | SV Length           | -2.23E-07 | 2.17E-08 | -10.26 | 1.11E-24 |
|              | Within TAD          | -8.18E-03 | 2.24E-03 | -3.647 | 0.000266 |
| Duplications | Enhancer sum        | -1.08E-02 | 3.76E-03 | -2.862 | 0.00421  |
|              | Promoter proportion | 4.94E-01  | 1.17E-01 | 4.202  | 2.64E-05 |
|              | SV Length           | 2.70E-07  | 2.92E-08 | 9.214  | 3.16E-20 |
|              | Within TAD          | 2.71E-03  | 3.64E-03 | 0.744  | 0.45673  |

**Supplementary Table 3.** Coefficients of linear model to predict expression z-score after excluding all variants overlapping genes
